# Supplementary material
Source: MDPI journal article supplement (https://www.mdpi.com/2072-4292/15/21/5108)
Supplement: s1 [file s1 › Supplementary Files.pdf]

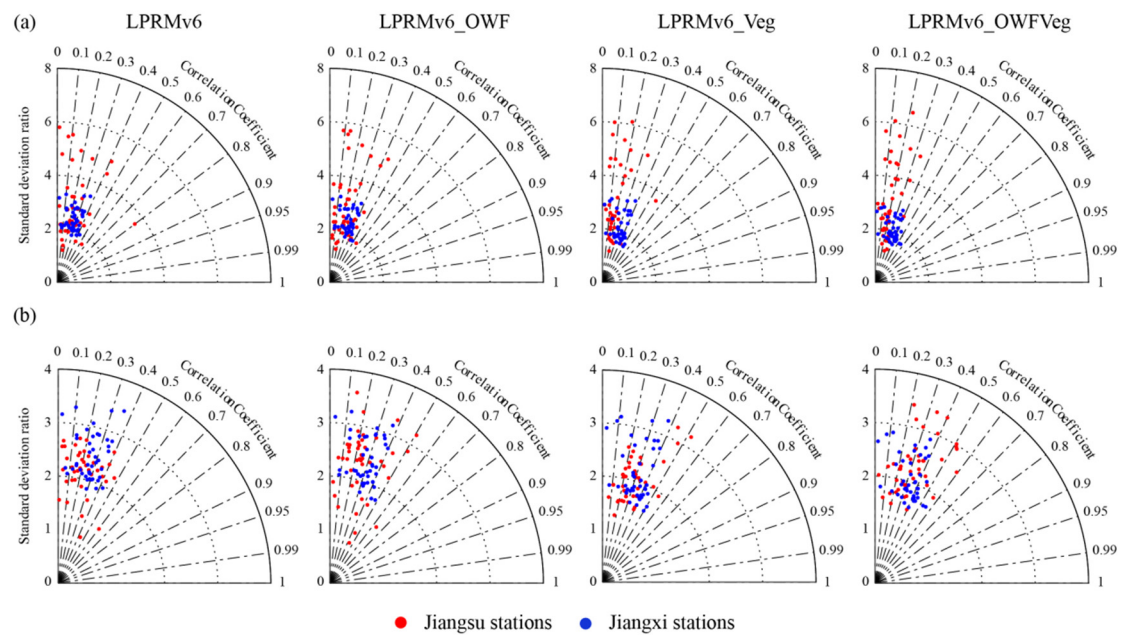

**Figure S1:** Taylor diagrams of multiple datasets against the in situ observations of Jiangsu and Jiangxi stations based on (a) soil moisture anomalies and (b) soil moisture original time series.
