# Supplementary material
Source: MDPI journal article supplement (https://www.mdpi.com/2072-4292/15/21/5108)

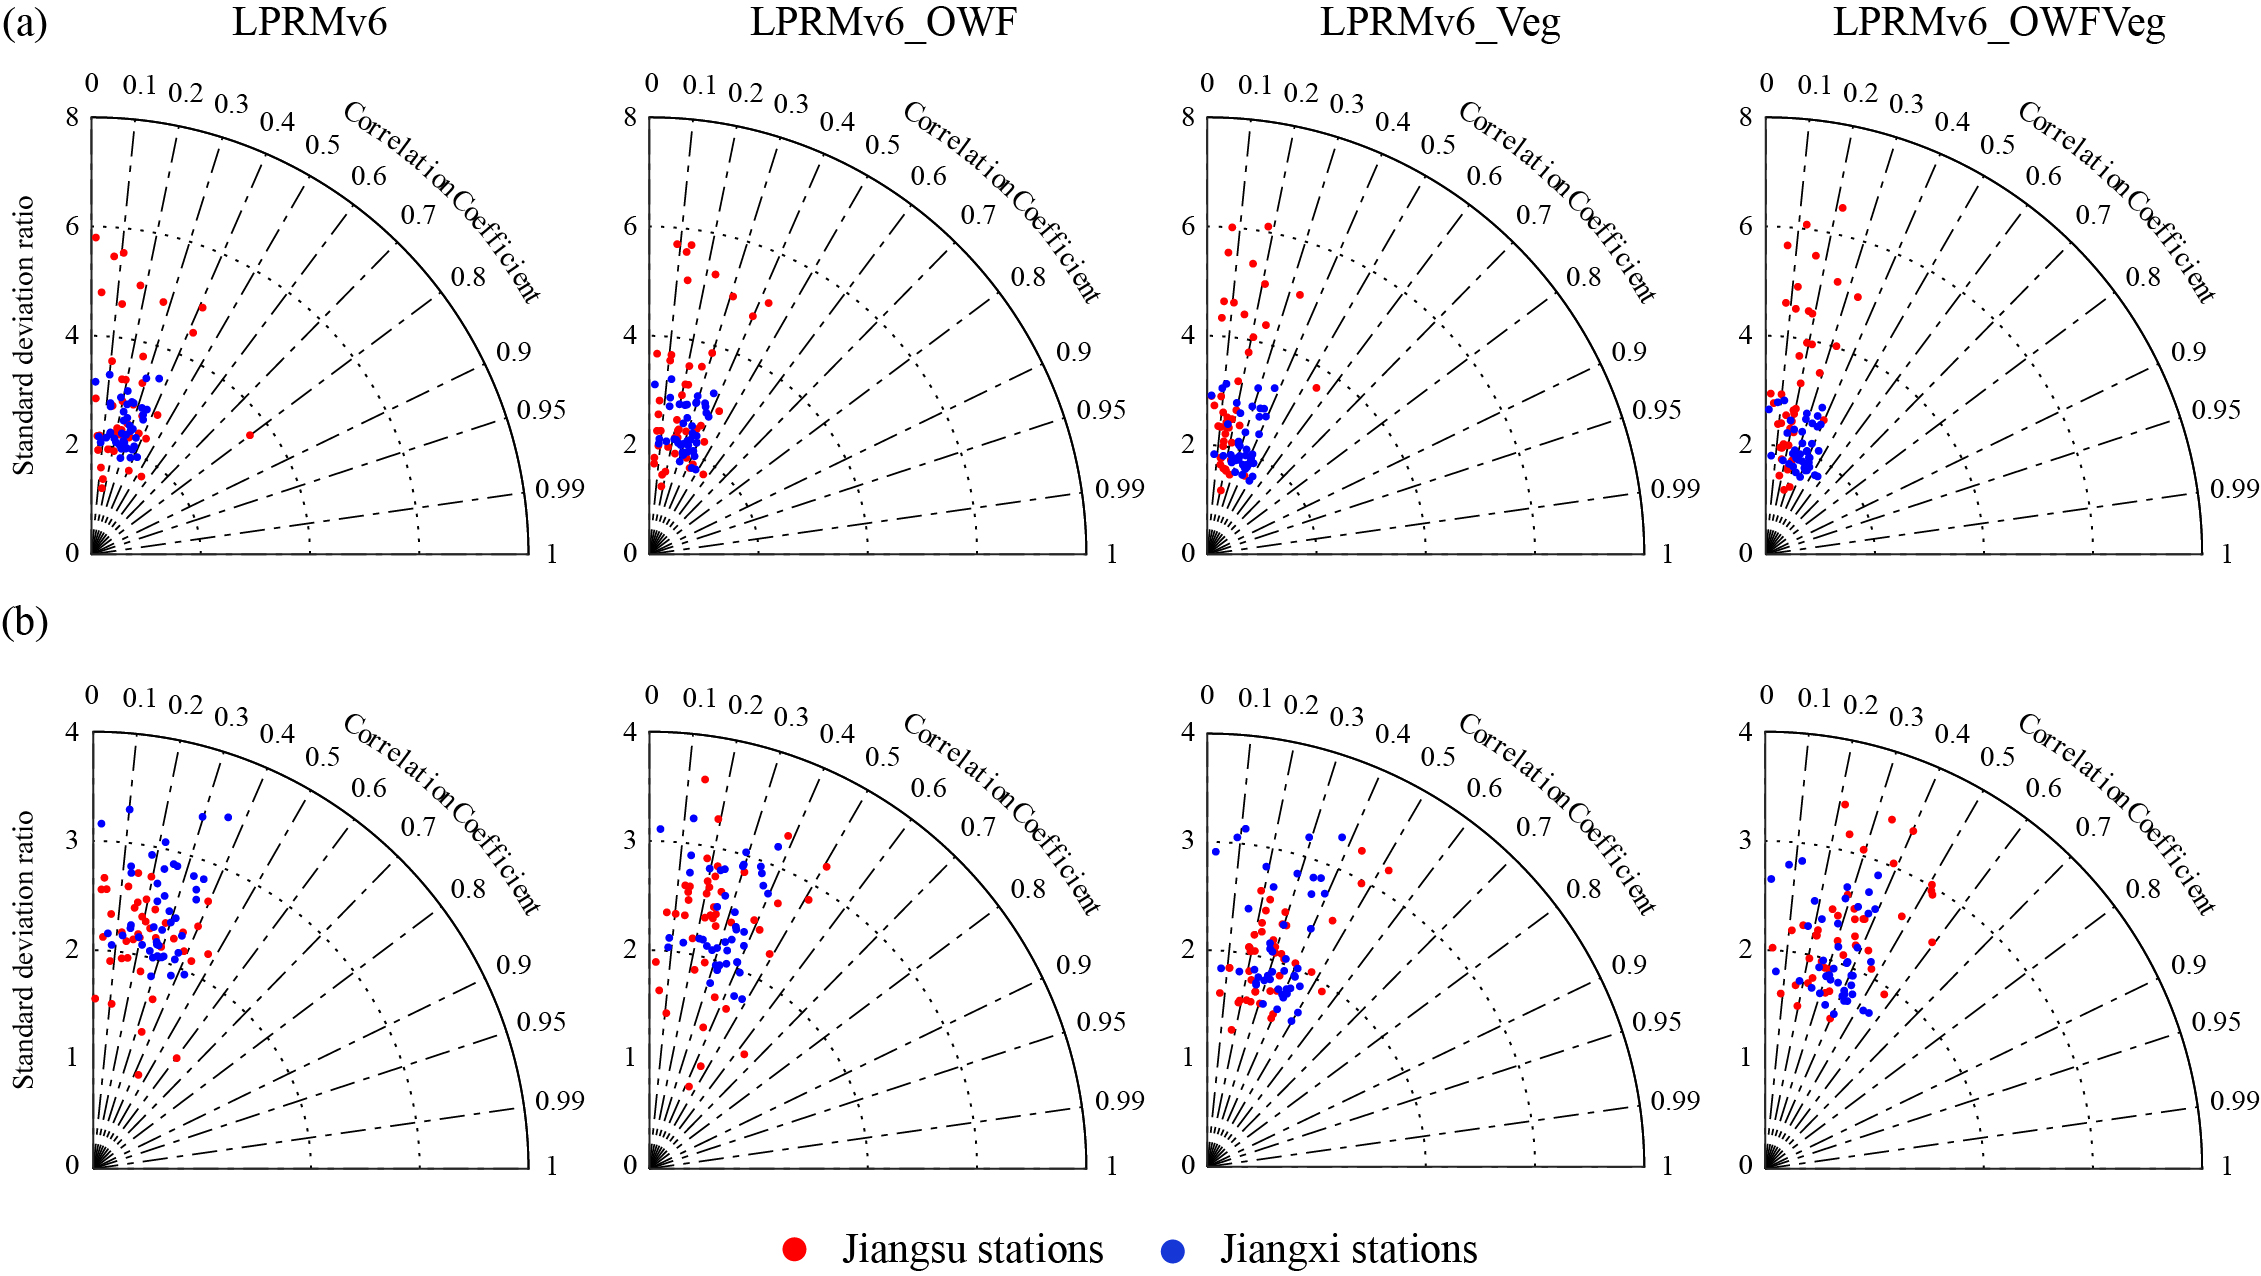

Supplement: s1 [file s1 › Figure S1.png]
